# Supplementary material for: Effect of real-time feedback on patient’s outcomes and survival after cardiac arrest: A systematic review and meta-analysis
Source: PubMed Central journal article supplement — Medicine (Baltimore). 2022 Sep 16;101(37):e30438. doi: 10.1097/MD.0000000000030438 (PMC9478281; doi:10.1097/md.0000000000030438), 2022-09-16
Supplement: medi-101-e30438-s001.pdf [file medi-101-e30438-s001.pdf]

**Supplementary Table 1.****Cochrane risk of bias assessment for randomized control trials**

| <b>Author, Year</b>        | <b>Random sequence generation</b> | <b>Allocation concealment</b> | <b>Blinding of participants and personnel</b> | <b>Blinding of outcome assessment</b> | <b>Incomplete outcome data</b> | <b>Selective reporting</b> | <b>Other bias</b> |
|----------------------------|-----------------------------------|-------------------------------|-----------------------------------------------|---------------------------------------|--------------------------------|----------------------------|-------------------|
| Goharani et al, 2019       | Low Risk                          | Low Risk                      | High Risk                                     | Unclear Risk                          | High Risk                      | Low Risk                   | Low Risk          |
| Hostler et al, 2011        | Unclear Risk                      | Unclear Risk                  | High Risk                                     | Unclear Risk                          | Low Risk                       | Low Risk                   | Low Risk          |
| Vahedian-Azimi et al, 2020 | Low Risk                          | Low Risk                      | High Risk                                     | Unclear Risk                          | High Risk                      | Low Risk                   | Low Risk          |

**Supplementary Table 2**

**Newcastle-Ottawa scale for evaluating the quality of cohort studies (Cohort studies)**

| <b>Author, Year</b>         | <b>Representative exposed cohort</b> | <b>Selection of the non-exposed cohort</b> | <b>Ascertainment of exposure</b> | <b>Demonstration that outcome of interest was not present at start of study</b> | <b>Comparability of cohorts on the basis of the design or analysis</b> | <b>Assessment of outcome</b> | <b>Follow-up long enough for outcomes to occur</b> | <b>Adequacy of follow up of cohorts</b> |
|-----------------------------|--------------------------------------|--------------------------------------------|----------------------------------|---------------------------------------------------------------------------------|------------------------------------------------------------------------|------------------------------|----------------------------------------------------|-----------------------------------------|
| Bobrow et al, 2013          | *                                    | *                                          | *                                | *                                                                               | *                                                                      |                              | *                                                  | *                                       |
| Couper et al, 2015          | *                                    | *                                          | *                                | *                                                                               |                                                                        |                              | *                                                  | *                                       |
| Crowe et al, 2015           | *                                    | *                                          | *                                | *                                                                               |                                                                        |                              |                                                    |                                         |
| Kramer-Johansen et al, 2006 | *                                    | *                                          | *                                | *                                                                               | *                                                                      |                              |                                                    |                                         |
| Lakomek et al, 2020         | *                                    | *                                          | *                                | *                                                                               | *                                                                      |                              |                                                    |                                         |
| Sainio et al, 2013          | *                                    | *                                          | *                                | *                                                                               |                                                                        |                              | *                                                  | *                                       |

\*The star indicates this study got one score for that category

---

**Supplementary Table 2****Newcastle-Ottawa scale for evaluating the quality of case-control studies (cross-sectional studies)**

| <b>Author, Year</b> | <b>Adequate definition of cases</b> | <b>Representativeness of cases</b> | <b>Selection of control subjects</b> | <b>Definition of control subjects</b> | <b>Control for important factor or additional factor</b> | <b>Exposure assessment</b> | <b>Same method of ascertainment for all subjects</b> | <b>Non-response rate</b> |
|---------------------|-------------------------------------|------------------------------------|--------------------------------------|---------------------------------------|----------------------------------------------------------|----------------------------|------------------------------------------------------|--------------------------|
| Abella et al, 2007  | *                                   | *                                  | *                                    | *                                     |                                                          | *                          | *                                                    | *                        |

\*The star indicates this study got one score for that category
